# Supplementary material for: Measuring the Urban Forms of Shanghai’s City Center and Its New Districts: A Neighborhood-Level Comparative Analysis
Source: MDPI journal article supplement (doi:10.3390/su13158481), 2021-07-29
Supplement: s1 [file s1]

Table S1 Bivariate Analysis Results

|                                    | Residential buildings | office buildings | Bus stop | Subway station (400m and 800m) | Gas station (400m and 800m) | Parking lot | Street network length | Street intersections | Regular restaurant | Fast-food restaurant | Hotel | Retail store (200m, 400m, and 800m) | Supermarket | Farmer's market | Bank | Hospital | Drug store | School | Park (200m, 400m, and 800m) |
|------------------------------------|-----------------------|------------------|----------|--------------------------------|-----------------------------|-------------|-----------------------|----------------------|--------------------|----------------------|-------|-------------------------------------|-------------|-----------------|------|----------|------------|--------|-----------------------------|
| Residential buildings              |                       |                  |          |                                |                             |             |                       |                      |                    |                      |       |                                     |             |                 |      |          |            |        |                             |
| office buildings                   | ++++                  |                  |          |                                |                             |             |                       |                      |                    |                      |       |                                     |             |                 |      |          |            |        |                             |
| Bus stop                           | ///+                  | /+++             |          |                                |                             |             |                       |                      |                    |                      |       |                                     |             |                 |      |          |            |        |                             |
| Subway station (400m and 800m)     | ++                    | ++               | ++       |                                |                             |             |                       |                      |                    |                      |       |                                     |             |                 |      |          |            |        |                             |
| Gas station (400m and 800m)        | /+                    | ++               | ++       | /+                             |                             |             |                       |                      |                    |                      |       |                                     |             |                 |      |          |            |        |                             |
| Parking lot                        | ++++                  | ++++             | /+++     | ++                             | /+                          |             |                       |                      |                    |                      |       |                                     |             |                 |      |          |            |        |                             |
| Street network length              | ////                  | //-/             | ////     | //                             | /-                          | ///-        |                       |                      |                    |                      |       |                                     |             |                 |      |          |            |        |                             |
| Street intersections               | ////                  | ///-             | ////     | //                             | /-                          | ///-        | ++++                  |                      |                    |                      |       |                                     |             |                 |      |          |            |        |                             |
| Restaurant                         | ++++                  | ++++             | ++++     | ++                             | ++                          | ++++        | ///-                  | ///-                 |                    |                      |       |                                     |             |                 |      |          |            |        |                             |
| Fast food restaurant               | ++++                  | ++++             | ++++     | ++                             | /+                          | ++++        | ///-                  | ///-                 | ++++               |                      |       |                                     |             |                 |      |          |            |        |                             |
| Hotel                              | ++++                  | ++++             | ++++     | ++                             | ++                          | ++++        | ///-                  | ///-                 | ++++               | ++++                 |       |                                     |             |                 |      |          |            |        |                             |
| Retail store (200m, 400m and 800m) | /++                   | +++              | +++      | ++                             | //                          | +++         | ///                   | ///                  | +++                | +++                  | +++   |                                     |             |                 |      |          |            |        |                             |
| Supermarket                        | ++++                  | ++++             | ++++     | ++                             | /+                          | /+++        | ///-                  | ///-                 | ++++               | ++++                 | ++++  | +++                                 |             |                 |      |          |            |        |                             |
| Farmer's market                    | ++++                  | /+++             | ++/+     | /+                             | /+                          | /+++        | ///-                  | ///-                 | ++++               | ++++                 | ++++  | +/+                                 | ++++        |                 |      |          |            |        |                             |
| Bank                               | ++++                  | ++++             | ++++     | ++                             | /+                          | ++++        | ////                  | ////                 | ++++               | ++++                 | ++++  | +++                                 | ++++        | ++++            |      |          |            |        |                             |
| Hospital                           | ++++                  | ++++             | /+++     | ++                             | ++                          | ++++        | /---                  | /-/                  | ++++               | ++++                 | ++++  | /++                                 | ++++        | +/+             | /+++ |          |            |        |                             |
| Drug store                         | ++++                  | /+++             | /+++     | /+                             | /+                          | /+++        | ///-                  | ////                 | ++++               | ++++                 | ++++  | +++                                 | ++++        | ++++            | ++++ | /+++     |            |        |                             |
| Educational use                    | +/+                   | /+++             | /+++     | /+                             | ++                          | ++++        | /+//                  | /+//                 | ++++               | ++++                 | /+++  | +++                                 | /+++        | /+++            | /+++ | /+++     | /+++       |        |                             |
| Park (200m, 400m and 800m)         | /++                   | /++              | /++      | /+                             | /+                          | /++         | ///                   | ///                  | /++                | /++                  | /++   | /+                                  | //+         | //+             | /++  | /++      | //+        | /++    |                             |

Note:

"+" indicates positive association at &lt;0.05; "-" indicates negative association at &lt;0.05; "/" indicates not significant at 0.05.

Almost all school-centered neighborhoods do not have a subway station or gas station within 100 meters or 200 meters. Therefore, measures in 400-meter and 800-meter buffers are tested for those two features.

Almost of school-centered neighborhoods do not have a retail store or park within 100 meters. Therefore, measures in 200-, 400-, and 800-meter buffers were tested for those two features.
